# Supplementary material for: Pseudo-equilibrium equations for calcium phosphate precipitation with multi-unit particles
Source: Royal Society of Chemistry journal article supplement (doi:10.1039/d3cp03700b), 2023-11-14
Supplement: d3cp03700b1.pdf [file d3cp03700b1.pdf]

## Electronic Supplementary Information

### M1. A model of reaction

Here we present a simplified model of reaction (Scheme S1), to make the data analysis simpler while still retaining the critical aspects of the reaction.

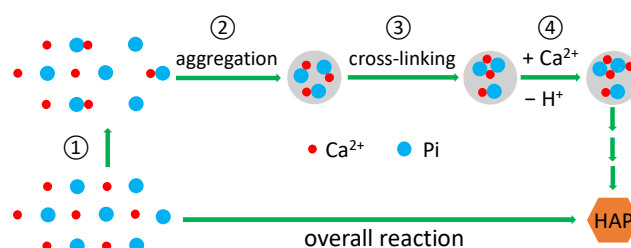

Scheme S1 Calcium phosphate precipitation via aggregation-facilitated cross-linking.

Inorganic phosphate (Pi) is present mainly as  $\text{H}_2\text{PO}_4^-$  and  $\text{HPO}_4^{2-}$  in the near-neutral medium (eqn (1)). They bind  $\text{Ca}^{2+}$  ions, forming  $\text{CaH}_2\text{PO}_4^+$  and  $\text{CaHPO}_4$  (eqn (2) and (3), Step ① in Scheme S1), respectively; where  $x$  and  $(1-x)$  represent their proportions. Given the  $\text{H}_2\text{O}$  molecules in the coordination sphere of a  $\text{Ca}^{2+}$  ion,<sup>1, 2</sup>  $\text{CaH}_2\text{PO}_4^+$  and  $\text{CaHPO}_4$  could be called “calcium phosphate clusters”.

These solution clusters form aggregate particles (eqn (5), Step ② in Scheme S1), known as ACP. Under the experimental conditions, the incipient ACP is dominantly composed of  $\text{CaHPO}_4$  clusters, while the content of  $\text{CaH}_2\text{PO}_4^+$  in ACP is much lower, as judged by their formation constants. Moreover, most of the  $\text{CaH}_2\text{PO}_4^+$  clusters in the particles become  $\text{CaHPO}_4$  clusters by releasing protons (eqn (4)). Because the clusters in an aggregate particle are closer to each other than those in solution, the cross-linking among them takes place more readily (eqn (6), Step ③ in Scheme S1), where  $m_0$  denotes the number of phosphates in a cross-linked cluster. Some of the cross-linked clusters get additional  $\text{Ca}^{2+}$  ions, and the increased positive charges facilitate the proton release from a  $\text{Ca}^{2+}$ -bound  $\text{HPO}_4^{2-}$  ion, leading to the generation of a  $\text{Ca}^{2+}$ -bound  $\text{PO}_4^{3-}$  ion (eqn (7), Step ④ in Scheme S1).

The overall reaction is shown in eqn (8), where  $y$  and  $(1-y)$  represent the  $\text{PO}_4^{3-}$  and  $\text{HPO}_4^{2-}$  proportions in the precipitate formula  $\text{Ca}_{(1-y)m_0}(\text{HPO}_4)_{(1-y)m_0}\text{Ca}_{1.5ym_0}(\text{PO}_4)_{ym_0}$ , respectively. Using the numbers of Ca and P atoms in the formula, we relate  $y$  with the experimentally determined Ca/P molar ratio ( $r$ , eqn (9)). Using eqn (9), we express the overall reaction as eqn (10), where the formula  $\text{Ca}_{rm_0}(\text{HPO}_4)_{(1-y)m_0}(\text{PO}_4)_{ym_0}$  represents a cross-linked cluster that exists as the structural unit of a precipitate particle. The formula is equivalent to  $\text{Ca}_{rm_0}(\text{H})_{(1-y)m_0}(\text{PO}_4)_{m_0}$ , and the latter becomes  $\text{Ca}_{10}(\text{OH})_2(\text{PO}_4)_6$  if  $m_0 = 6$ ,  $r = 5/3$ , and  $(\text{H})_{-2} = (\text{OH})_2$ . Following the convention of presenting precipitation reactions, we express the dissociation constant in eqn (11), where  $(\text{IP})_{m_0}$  and  $[S_{m_0}]$  represent the ionic product and the precipitate concentration in terms of the structural unit, respectively. To indicate the multiple structural units in a particle, we rewrite eqn (10) as eqn (12). For now, however, we focus on the reaction concerning the structural unit (eqn (10)). But one should be aware that the structural unit is within an aggregate particle, rather than a discrete one dispersed in solution.

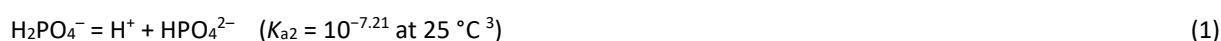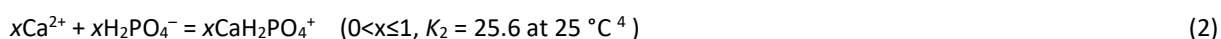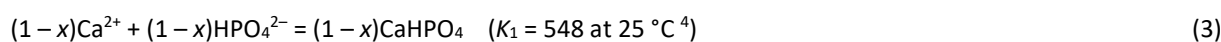

where  $K_2$  and  $K_1$  are the formation constants of  $\text{CaH}_2\text{PO}_4^+$  and  $\text{CaHPO}_4$ , respectively.

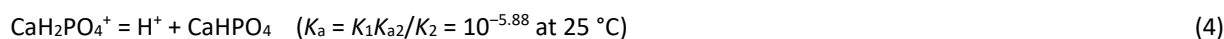

$$v\text{CaHPO}_4 = (\text{CaHPO}_4)_v \quad (5)$$

where  $v$  denotes the number of clusters in an aggregate particle.

$$(\text{CaHPO}_4)_{m_0} = \text{Ca}_{m_0}(\text{HPO}_4)_{m_0} \quad (m_0 \leq v) \quad (6)$$

$$0.5ym_0\text{Ca}^{2+} + \text{Ca}_{m_0}(\text{HPO}_4)_{m_0} = ym_0\text{H}^+ + \text{Ca}_{(1-y)m_0}(\text{HPO}_4)_{(1-y)m_0}\text{Ca}_{1.5ym_0}(\text{PO}_4)_{ym_0} \quad (7)$$

$$rm_0\text{Ca}^{2+} + (1-x)m_0\text{HPO}_4^{2-} + xm_0\text{H}_2\text{PO}_4^- = (x+y)m_0\text{H}^+ + \text{Ca}_{(1-y)m_0}(\text{HPO}_4)_{(1-y)m_0}\text{Ca}_{1.5ym_0}(\text{PO}_4)_{ym_0} \quad (8)$$

$$y = 2(r-1) \quad (9)$$

$$rm_0\text{Ca}^{2+} + (1-x)m_0\text{HPO}_4^{2-} + xm_0\text{H}_2\text{PO}_4^- = (x+y)m_0\text{H}^+ + \text{Ca}_{rm_0}(\text{HPO}_4)_{(1-y)m_0}(\text{PO}_4)_{ym_0} \quad (10)$$

$$K_{d,m_0} = \frac{(\text{IP})_{m_0}}{[S_{m_0}]} \quad (11)$$

$$rm_0\text{Ca}^{2+} + (1-x)m_0\text{HPO}_4^{2-} + xm_0\text{H}_2\text{PO}_4^- = (x+y)m_0\text{H}^+ + \frac{1}{u}\{\text{Ca}_{rm_0}(\text{HPO}_4)_{(1-y)m_0}(\text{PO}_4)_{ym_0}\}_u \quad (12)$$

The concentration  $[S_{m_0}]$  in eqn (11) can be expressed in either the P or Ca content ( $[S_P]$  and  $[S_{Ca}]$ , eqn (13)). The corresponding ionic product  $(\text{IP})_{m_0}$  is defined in eqn (14), where the ion charges are eliminated for clarity and the exponential term  $m_0$  is a constant to be determined from the solution chemistry data. The square brackets indicate (pseudo)equilibrium concentrations in molarity. In the presence of 150 mmol L<sup>-1</sup> NaCl, the reaction-caused change in the ion strength of the solution could be neglected. Thus, we use the numerical values of molarity in place of the dimensionless activities.

$$[S_{m_0}] \equiv [\text{Ca}_{rm_0}(\text{HPO}_4)_{(1-y)m_0}(\text{PO}_4)_{ym_0}] \equiv [\text{Ca}_{rm_0}(\text{H})_{(1-y)m_0}(\text{PO}_4)_{m_0}] = \frac{[S_P]}{m_0} = \frac{[S_{Ca}]}{rm_0} \quad (13)$$

$$(\text{IP})_{m_0} = (\text{IP})_0^{m_0} \quad (14a)$$

$$(\text{IP})_0 = \frac{[\text{Ca}]^r[\text{HPO}_4]^{(1-x)}[\text{H}_2\text{PO}_4]^x}{[\text{H}]^{(x+y)}} \quad (14b)$$

By introducing eqn (13) and (14) into eqn (11), we obtain

$$[S_P] = (\text{IP})_0^{m_0} \cdot \frac{m_0}{K_{d,m_0}} \quad (15)$$

Taking the natural logarithm of eqn (15) gives

$$\ln[S_P] = m_0 \cdot \ln(\text{IP})_0 + \ln\left(\frac{m_0}{K_{d,m_0}}\right) \quad (16)$$

Similarly, we obtain the equations where  $[S_{m_0}]$  is expressed in terms of  $[S_{Ca}]$ :

$$[S_{Ca}] = (\text{IP})_0^{m_0} \cdot \frac{rm_0}{K_{d,m_0}} \quad (17)$$

$$\ln[S_{Ca}] = m_0 \cdot \ln(\text{IP})_0 + \ln\left(\frac{rm_0}{K_{d,m_0}}\right) \quad (18)$$

To apply eqn (16) and (18) to the solution chemistry data, we need to calculate  $(\text{IP})_0$  by eqn (14b), where the values of  $x$  and  $y$  are determined in different ways. The symbol  $y$  represents the proportion  $\text{PO}_4^{3-}/(\text{PO}_4^{3-} + \text{HPO}_4^{2-})$  in the precipitate formula. Its values from CRC onwards are calculated by eqn (9) from the experimentally determined  $r$  values. On the assumption that the five reaction systems were in a common pseudo-equilibrium state at a sampling time, the precipitate samples collected from these systems should be the same in composition and structure, only different in quantity. Hence, the average  $r$  value of the five systems is used in calculating the  $y$  value. As to the amorphous precipitate formed mainly from the  $\text{CaHPO}_4$  clusters in the induction period, we assume  $r = 1$  and thus  $y = 0$ .

The  $x$  values are dependent on the solution composition. Since a  $\text{CaH}_2\text{PO}_4^+$  cluster and a  $\text{CaHPO}_4$  cluster have roughly the same probability of forming aggregate particles via random collision, the  $\text{CaHPO}_4$  proportions that are derived from

$\text{H}_2\text{PO}_4^-$  and  $\text{HPO}_4^{2-}$  in an aggregate particle are equal to their proportions in solution ( $x$  and  $(1-x)$ ), respectively. Therefore, we calculate the  $x$  values for each of the five systems by eqn (19), using their respective pH values.

$$x = \frac{[\text{CaH}_2\text{PO}_4^+]}{[\text{CaH}_2\text{PO}_4^+] + [\text{CaHPO}_4]} = \frac{K_2[\text{H}^+]}{K_2[\text{H}^+] + K_1K_{a2}} \quad (19)$$

It should be noted that the calcium phosphate clusters, freshly formed in the medium containing 150 mmol L<sup>-1</sup> NaCl, interfered with the measurement of free ionic calcium ( $[\text{Ca}^{2+}]$ ) by a Ca-selective electrode, and it was hard to estimate the magnitude of deviation in a continuous measurement. To obviate the direct measurement of  $[\text{Ca}^{2+}]$ , we calculate it from other measured quantities. Eqn (20) and (21) are the mass balances of the calcium and phosphate in the supernatant (LCa and LPi) from centrifugation, respectively. Here cCa and cPi denote the complexed  $\text{Ca}^{2+}$  ion and the Ca-bound phosphate, respectively, which are defined in eqn (22). To facilitate solving the unknown quantities, we construct eqn (23) from eqn (21) and (22). Then, we eliminate the quantity  $[\text{Ca}^{2+}]$  by plugging eqn (20), which enables us to solve cCa from the equation and to determine its value using LCa, LPi, and pH. Finally, we calculate the  $[\text{Ca}^{2+}]$  value by eqn (20).

$$\text{LCa} = \text{cCa} + [\text{Ca}^{2+}] \quad (20)$$

$$\text{LPi} = \text{cPi} + [\text{HPO}_4^{2-}] + [\text{H}_2\text{PO}_4^-] \quad (21)$$

$$\text{cCa} = \text{cPi} = [\text{CaHPO}_4] + [\text{CaH}_2\text{PO}_4^+] \quad (22)$$

$$\frac{\text{cPi}}{\text{LPi} - \text{cPi}} = \frac{(K_1K_{a2} + K_2[\text{H}^+]) \cdot [\text{Ca}^{2+}]}{K_{a2} + [\text{H}^+]} \quad (23)$$

## References

1. J. R. Dorvee and A. Veis, *J. Struc. Biol.*, 2013, **183**, 278-303.
2. L.-W. Du, S. Bian, B.-D. Gou, Y. Jiang, J. Huang, Y.-X. Gao, Y.-D. Zhao, W. Wen, T.-L. Zhang and K. Wang, *Cryst. Growth Des.*, 2013, **13**, 3103-3109.
3. D. R. Lide, *CRC Handbook of Chemistry and Physics*, CRC Press, 2008.
4. A. Chughtai, R. Marshall and G. H. Nancollas, *J. Phys. Chem.*, 1968, **73**, 208-211.

**Table S1. Linear fitting results of  $\ln(S_p)$  vs.  $\ln(IP)_0$  and  $\ln(S_{Ca})$  vs.  $\ln(IP)_0$  plots\***

(a) Series CPn (n = 3.0, 3.5, 4.0, 4.5, 5.0)

| CPn   | $\ln(S_p)$ vs. $\ln(IP)_0$ plot |                  |          |            | $\ln(S_{Ca})$ vs. $\ln(IP)_0$ plot |                  |          |           | slope average   |
|-------|---------------------------------|------------------|----------|------------|------------------------------------|------------------|----------|-----------|-----------------|
|       | Slope                           | Intercept        | R-Square | Data       | Slope                              | Intercept        | R-Square | Data      |                 |
| Ind-1 | $1.87 \pm 0.15$                 | $15.45 \pm 1.86$ | 0.9874   | del 4.0    | $1.97 \pm 0.28$                    | $16.81 \pm 3.55$ | 0.9599   | del 4.5   | $1.92 \pm 0.05$ |
| Ind-2 | $1.66 \pm 0.35$                 | $12.88 \pm 4.33$ | 0.8829   | all        | $1.62 \pm 0.41$                    | $12.64 \pm 5.15$ | 0.8352   | all       | $1.64 \pm 0.02$ |
| Ind-3 | $1.84 \pm 0.27$                 | $15.36 \pm 3.45$ | 0.9589   | del 4.0    | $2.09 \pm 0.40$                    | $18.76 \pm 4.98$ | 0.9009   | all       | $1.97 \pm 0.13$ |
| CRC   | $1.06 \pm 0.01$                 | $-1.59 \pm 0.06$ | 0.9999   | [3.5, 4.5] | $1.03 \pm 0.16$                    | $-1.44 \pm 0.76$ | 0.9768   | [3.5,4.5] | $1.05 \pm 0.02$ |
| 1H    | $0.619 \pm 0.10$                | $-4.29 \pm 0.35$ | 0.9497   | del 3.0    | $0.707 \pm 0.078$                  | $-3.69 \pm 0.27$ | 0.9761   | del 3.0   | $0.66 \pm 0.04$ |
| 3H    | $0.670 \pm 0.04$                | $-4.60 \pm 0.12$ | 0.9921   | del 3.0    | $0.626 \pm 0.022$                  | $-4.40 \pm 0.06$ | 0.9976   | del 3.0   | $0.65 \pm 0.03$ |
| 6H    | $0.498 \pm 0.08$                | $-4.92 \pm 0.24$ | 0.9538   | del 3.0    | $0.498 \pm 0.03$                   | $-4.62 \pm 0.09$ | 0.9925   | del 3.0   | $0.50 \pm 0.00$ |
| 12H   | $0.587 \pm 0.07$                | $-5.13 \pm 0.16$ | 0.9630   | all        | $0.549 \pm 0.08$                   | $-4.90 \pm 0.20$ | 0.9384   | all       | $0.57 \pm 0.02$ |

(b) Series pH (pH = 7.60, 8.00, 8.50, 9.00, 9.50)

| pH    | $\ln(S_p)$ vs. $\ln(IP)_0$ |                   |          |             | $\ln(S_{Ca})$ vs. $\ln(IP)_0$ |                   |          |             | slope average    |
|-------|----------------------------|-------------------|----------|-------------|-------------------------------|-------------------|----------|-------------|------------------|
|       | Slope                      | Intercept         | R-Square | Data        | Slope                         | Intercept         | R-Square | Data        |                  |
| Ind-1 | $-3.18 \pm 0.13$           | $-47.34 \pm 1.60$ | 0.9984   | 7.6,8.5,9.5 | $-2.72 \pm 0.18$              | $-41.26 \pm 2.28$ | 0.9955   | 8.0,8.5,9.5 | $2.95 \pm 0.23$  |
| Ind-2 | $-2.63 \pm 0.11$           | $-40.43 \pm 1.36$ | 0.9965   | del 9.0     | $-2.42 \pm 0.30$              | $-37.35 \pm 3.74$ | 0.9702   | del 7.6     | $2.53 \pm 0.11$  |
| Ind-3 | $-2.49 \pm 0.24$           | $-38.46 \pm 2.94$ | 0.9735   | all         | $-1.13 \pm 0.04$              | $-21.17 \pm 0.51$ | 0.9987   | [8.0,9.0]   | $1.81 \pm 0.68$  |
| CRC   | $-0.588 \pm 0.059$         | $-8.45 \pm 0.19$  | 0.9801   | del 7.6     | $-0.606 \pm 0.077$            | $-8.20 \pm 0.25$  | 0.9683   | del 7.6     | $0.60 \pm 0.01$  |
| 1H    | $-0.463 \pm 0.045$         | $-8.11 \pm 0.15$  | 0.9727   | all         | $-0.456 \pm 0.048$            | $-7.78 \pm 0.16$  | 0.9679   | all         | $0.46 \pm 0.004$ |
| 3H    | $-0.368 \pm 0.070$         | $-7.67 \pm 0.22$  | 0.9024   | all         | $-0.409 \pm 0.027$            | $-7.49 \pm 0.09$  | 0.9866   | all         | $0.39 \pm 0.02$  |
| 6H    | $-0.262 \pm 0.11$          | $-7.32 \pm 0.33$  | 0.7400   | del 9.5     | $-0.428 \pm 0.062$            | $-7.54 \pm 0.19$  | 0.9602   | del 9.5     | $0.35 \pm 0.08$  |
| 12H   | $-0.412 \pm 0.069$         | $-7.27 \pm 0.13$  | 0.9474   | del 9.0     | $-0.397 \pm 0.11$             | $-6.90 \pm 0.20$  | 0.8770   | del 9.0     | $0.40 \pm 0.01$  |

\* Significant digit = 3 for  $(IP)_0$ ,  $(S_p)$ , and  $(S_{Ca})$ . Curve-fitting was performed using Origin software.
